# Supplementary material for: Quantitative Expression of C-Type Lectin Receptors in Humans and Mice
Source: MDPI journal article supplement (doi:10.3390/ijms130810113), 2012-08-14
Supplement: s2 [file s2]

*Int. J. Mol. Sci.* **2012**, *13*, 17294; doi:10.3390/ijms131217294

**OPEN ACCESS**

International Journal of

Molecular Sciences
ISSN 1422-0067
www.mdpi.com/journal/ijms

Correction

**Lech, M., *et al.*, Quantitative Expression of C-Type Lectin Receptors in Humans and Mice. *Int. J. Mol. Sci.* 2012, *13*,****10113-10131.**

**Maciej Lech *, Heni Eka Susanti, Christoph Römmele, Regina Gröbmayr, Roman Günthner and Hans-Joachim Anders**

Medical Clinic and Policlinic IV, Nephrological Center, University of Munich, 80336 Munich, Germany; E-Mails: heni_eka.Susanti@med.uni-muenchen.de (H.E.S);
christoph.roemmele@med.uni-muenchen.de (C.R.); regina.gröbmayr@med.uni-muenchen.de (R.G.); roman.günthner@med.uni-muenchen.de (R.G.); hjanders@med.uni-muenchen.de (H.-J.A.)

***** Author to whom correspondence should be addressed;
E-Mail: Maciej.Lech@med.uni-muenchen.de; Tel.:+49-89-218-075-855;
Fax: +49-89-218-075-860.

*Received: 15 October 2012; in revised form: 18 October 2012 / Accepted: 18 October 2012 / Published: 18 December 2012*

The authors wish to add this correction on their paper published in *IJMS* [1]. Galectin-1 was misclassified as a C-type lectin. Galectin-1 belongs to the family of the S-type lectins, *i.e.*, the galectins. These errors have been amended in an amended version of the manuscript, which is available from the International Journal of Molecular Sciences website. The authors and publisher apologize for the inconvenience.

The corrected version can be accessed at: http://www.mdpi.com/1422-0067/13/12/17294/s1.

**Reference**

1. Lech, M.; Susanti, H.E.; Römmele, C.; Gröbmayr, R.; Günthner, R.; Anders, H.-J. Quantitative expression of C-type lectin receptors in humans and mice. Int. J. Mol. Sci. **2012**, 13,
   10113–10131.

© 2012 by the authors; licensee MDPI, Basel, Switzerland. This article is an open access article distributed under the terms and conditions of the Creative Commons Attribution license (http://creativecommons.org/licenses/by/3.0/).
