# Supplementary material for: Quantitative Expression of C-Type Lectin Receptors in Humans and Mice
Source: Int J Mol Sci. 2012 Aug 14;13(8):10113–31. doi: 10.3390/ijms130810113 (PMC3431848; doi:10.3390/ijms130810113)
Supplement: Supplementary file 1 [file ijms-13-10113-s001.pdf]

Supplementary table 1

|            | mouse right primer sequence | mouse left primer sequence |
|------------|-----------------------------|----------------------------|
| dectin-1   | GTGCAGTAAGCTTTCTG           | TCCCGCAATCAGAGTGAAG        |
| MR1        | GTGGATTGTCTTGTGGAGCA        | TTGTGGTGAGCTGAAAGGTG       |
| MR2        | CTCCAGACAGCCCTGCAT          | GTCTTGCTTCTCGGGGGACT       |
| DC-SIGN    | CTGCACAGTCTTCTCTCCC         | TGGTACTGGGTAGATGGTTCA      |
| Syk        | TCTGCACCCCTTCAGAGTTC        | TCCTTTCAACGTTCCATGCT       |
| Card9      | ATGAGGCTGTGCCTGAGC          | GCTGCAAGGACGAGAAGTATG      |
| Bcl10      | TGCACGTAGATGATCAAAATGTC     | ACGGAGGAGGATTTGACTGA       |
| Malt1      | CAAAAGGATGTCCAGTTGCC        | CACACTGAGGTTCTTCCGCT       |
| Src        | TACCACTCCTCAGCCTGGAT        | ACACGAGGAAGGTGGATGTC       |
| DEC205     | TTCAGACCAATCCACAACCA        | AGCTCACCTACCCAGCTTCA       |
| Galectin-1 | GCGAGGATTGAAGTGTAGGC        | AATGTCTCAAAGTTTCGGGGA      |
| TIM3       | AGCCCATGTGGAAATTTTG         | CTCCAAGAACCCTAACCACG       |
| TREM1      | CACTGTCAAAGTCTGGCCCT        | ACTGCTGTGCGTGTTCTTTG       |
| DAP12      | TTGCCTCTGTGTGTTGAGGT        | CGGAAACAACACATTGCTGA       |

|            | human right primer sequence | human left primer sequence |
|------------|-----------------------------|----------------------------|
| dectin-1   | GGAGATGGGTTTTCTTGGGT        | GACTGAGGTACCATGGCTCTG      |
| MR1        | CCCATCGGAATTTCTGTGAT        | GGGTGCTGTTCTCCTACTGG       |
| MR2        | CAGTCCATGGCTGAAGATGA        | GCTGCGTCCTGCTCCTC          |
| DC-SIGN    | TTGTTGGGCTCTCCTCTGTT        | AAGTAACCGCTTCACCTGGA       |
| Syk        | AAAGAAGGGCAGGTGGTTG         | GAGAGCGAGGAGGAGCG          |
| Card9      | CTGTGCGTGCAGCTCCT           | TCCAAGATGTACAAGGACCG       |
| Bcl10      | TTGCACGTAGATGATCAAAATGT     | TCCCTCACCGAGGAGGAC         |
| Malt1      | GCCAAGACTGCCTTTGACTC        | TTTCCTGCAGGCTATGGAAC       |
| Src        | TAGTTGCTGGGGATGTAGCC        | CTGTCCTTCAAGAAAGGCGA       |
| DEC205     | CCAGCCAAAACTTCTCATTT        | TGGCTTCATGGGTCATGTTA       |
| Galectin-1 | AGGTTGTTGCTGTCTTTGCC        | CAAACCTGGAGAGTGCCTTC       |
| TIM3       | GCGAATTCCCTCTGCTACTG        | CTTCGGCGCTTTAATTTTCA       |
| TREM1      | TACTCAGGAATCCACCAGCC        | CCGATGTCTCCACTCCTGAC       |
| DAP12      | GTCATGATTCGGGCTCATTT        | GAGACCGAGTCGCCTTATCA       |
